1

2

## **Antibiotic killing of diversely generated populations of non-**

3

## **replicating bacteria**

4

5

6

Nilang Shah<sup>1</sup>, Ingrid McCall<sup>1</sup>, Adithi Govindan<sup>1</sup>, Fernando Baquero<sup>2</sup>

7

and Bruce Levin<sup>13\*</sup>

8

9

<sup>1</sup>Department of Biology

10

Emory University

11

Atlanta, GA 30322

12

<sup>2</sup>Department of Microbiology, Ramón y Cajal Institute for Health Research (IRYCIS),

13

Ramón y Cajal University Hospital, CIBERESP,

14

28034 Madrid, Spain

15

<sup>3</sup> Emory University Antibiotic Resistance Center

16

17

18

\* Correspondence should be sent to [blevin@emory.edu](mailto:blevin@emory.edu)

19

20

**Running Title** – Antibiotic killing of non-replicating bacteria

21

22

23

24

25 **Abstract:**

26 Non-replicating bacteria are known to be (or at least commonly thought to be) refractory  
27 to antibiotics to which they are genetically susceptible. Here, we explore the sensitivity  
28 to antibiotic-mediated killing of three classes of non-replicating populations of  
29 planktonic bacteria (1) stationary phase, when the concentration of resources and/or  
30 nutrients are too low to allow for population growth; (2) persisters, minority  
31 subpopulations of susceptible bacteria surviving exposure to bactericidal antibiotics; (3)  
32 antibiotic-static cells, bacteria exposed to antibiotics that prevent their replication but  
33 kill them slowly if at all, the so-called bacteriostatic drugs. Using experimental  
34 populations of *Staphylococcus aureus* Newman and *Escherichia coli* K12 and  
35 respectively 14 and 11 different antibiotics, we estimate the rates at which these drugs  
36 kill these different types of non-replicating bacteria. Contrary to the common belief that  
37 bacteria that are non-replicating are refractory to antibiotic-mediated killing, all three  
38 types of non-replicating populations of these Gram-positive and Gram-negative bacteria  
39 are consistently killed by aminoglycosides and the peptide antibiotics, daptomycin and  
40 colistin, respectively. This result indicates that non-replicating cells, irrespectively of  
41 why they do not replicate, have an almost identical response to the cidal activity of  
42 antibiotics. We discuss the implications of these results to our understanding of the  
43 mechanisms of action of antibiotics and the possibility of adding a short-course of  
44 aminoglycosides or peptide antibiotics to conventional therapy of bacterial infections.

45

46

47 **Introduction**

48 For therapeutic purposes, the relationship between the concentrations of antibiotics and  
49 the rates of growth and death of bacteria, pharmacodynamics, is almost exclusively  
50 studied *in-vitro* under conditions that are optimal for the action of these drugs; relatively  
51 low densities of bacteria growing exponentially in media and under culture conditions  
52 where all members of the exposed population have equal access to these drugs,  
53 resources, wastes and metabolites excreted into the environment. To be sure, in some  
54 sites and tissues in acutely infected hosts, relatively low densities of the target pathogens  
55 may be growing exponentially at their maximum rate and thus are under conditions that  
56 are optimal for the action of antibiotics. However, this situation is almost certainly  
57 uncommon in established, symptomatic and thereby treated infections where the  
58 offending bacteria are likely to be compartmentalized in different sites and tissues and  
59 confronting the host's immune defenses (1)

60

61 Infecting populations of bacteria may be non-replicating for different reasons and by  
62 different mechanisms. First, they may have exhausted the locally available resources;  
63 thus modified their environment so their populations are at or near stationary phase (2-  
64 6). Second, although local nutrients may be sufficient for their replication, for hosts  
65 treated with bactericidal drugs these bacteria may be minority populations of  
66 physiologically refractory survivors, the so-called "persisters" (7-9). Third, the offending  
67 bacteria may be non-replicating because of exposure to bacteriostatic antibiotics, a state  
68 we shall refer to as antibiotic-induced stasis. Fourth, infecting bacteria may be slowly  
69 replicating or at stationary phase inside phagocytes or other host cells (10, 11), or

70 attached to the surfaces of tissues or prosthetic devices and within polysaccharide  
71 matrices know as biofilms (12) and thereby not replicating for one or more of previously  
72 described reasons (4, 13).

73

74 The concept of antibiosis has been classically linked to the fight against of microbial  
75 active invasion of the host tissues, implying active replication. With some exceptions  
76 associated with permeability (14), the susceptibility of bacteria to killing by bactericidal  
77 antibiotics is related to their rate of replication. In fact, with beta-lactams, the rate at  
78 which bacteria are killed has been shown to be strictly proportional to the rate at which  
79 the population is growing (15, 16). The same trend seems to occur for other bactericidal  
80 agents as fluoroquinolones, aminoglycosides, glycopeptides, and lipopeptides (17-20).

81 It is well known that exposure to bacteriostatic antibiotics markedly reduce the efficacy  
82 of beta-lactam drugs to kill bacteria (21-23). However, save for these cases of  
83 antagonism between bacteriostatic and bactericidal drugs and the now more than a  
84 quarter of century old classical studies by R. Eng and colleagues (24), despite the  
85 potential clinical implications, there is remarkable little information about the  
86 pharmacodynamics of antibiotics for non-replicating populations of bacteria.

87

88 In this investigation we address two fundamental questions about the pharmacodynamics  
89 of non-replicating bacteria. What antibiotics and to what extent do these drugs kill non-  
90 replicating bacteria? With respect to their susceptibility to antibiotic-mediated killing  
91 are bacteria entering non-replicating states physiologically similar, irrespectively of the  
92 reason responsible for their not replicating? To address these questions we compare the

93 activity of antibiotics on non-replicating bacterial populations obtained by different  
94 procedures. We present the results of experiments estimating the susceptibility of  
95 various non-replicating populations of *Staphylococcus aureus* and *E. coli* to killing by  
96 respectively 14 and 11 different antibiotics. We consider three types of non-replicating  
97 states of planktonic bacteria; (i) those at stationary phase in oligotrophic culture, (ii) the  
98 non-replicating survivors of exposure to bactericidal antibiotics, persisters, and (iii)  
99 bacteria exposed to bacteriostatic antibiotics, antibiotic-static populations. Contrary to  
100 the popular conception that antibiotics are ineffective at killing bacteria that are not  
101 replicating, (15, 25, 26), even at relatively low concentrations a number of existing  
102 bactericidal antibiotics can kill non-replicating bacteria of all three states. The results of  
103 our experiments indicate that the same classes of antibiotics, the aminoglycosides and  
104 the peptides, are particularly effective at killing non-replicating bacteria irrespective of  
105 the mechanism responsible for their failure to replication. In addition to being relevant  
106 clinically, these results are interesting mechanistically; they suggest non-replicating  
107 bacteria of different types share a common cell physiology with respect to their  
108 interactions with antibiotics.

109

## 110 **Results**

111 **1- Antibiotic-mediated killing of exponentially growing bacteria:** As a baseline for  
112 our consideration of the antibiotic susceptibility of non-replicating bacteria, we explore  
113 the response of exponentially growing populations *S. aureus* and *E. coli* MG1655 to  
114 antibiotics. For these experiments, overnight cultures of these bacteria were added to  
115 broth at a ratio of 1:100 and incubated for 1.5 hours and the density of the cultures

116 estimated,  $N(0)$ . Five mls of these cultures were then put into 6 well "macrotiter"  
117 plates, CELLTREAT, and the antibiotics added. The results of these experiments are  
118 presented in Figure 1,

119

120

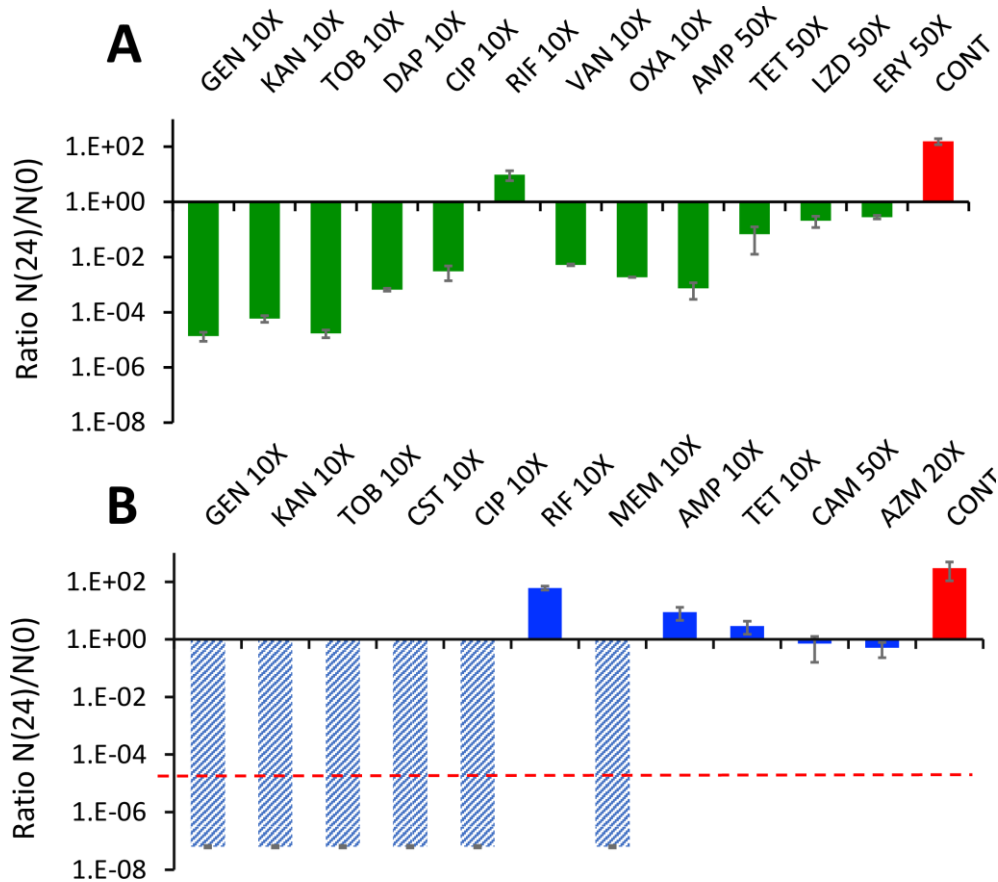

121

122

123 **Figure 1.** Ratio of the viable 24 hour and initial viable cell densities,  $N(24)/N(0)$  of  
124 exponentially growing broth cultures exposed to the concentrations of bactericidal and  
125 bacteriostatic antibiotics (multiples of MIC values). A. *Staphylococcus aureus* Newman  
126 in MHII. B. *E. coli* MG1655 in LB. Mean standard error of the  $N(24)/N(0)$  ratios of

127 three independent experiments each with three samples. The broken line is the limit of  
128 detection ( $10^2$  cells per ml, hatched bars mean that this limit was surpassed in the assay).  
129 The initial,  $N(0)$  densities of *S. aureus* and *E. coli* in these experiments were, on  
130 average,  $1.3 \pm 0.6 \times 10^7$  and  $1.6 \pm 0.2 \times 10^7$  cells per ml, respectively.

131

132 For *S. aureus*, the aminoglycosides, GEN, KAN and TOB kill to the greatest extent, with  
133 reductions in viable cell density of more than 4 orders of magnitude. DAP, CIP, VAN  
134 OXA and AMP are clearly bactericidal and reduce the viable cell density by more than 3  
135 orders of magnitude. The increase in the  $N(24)/N(0)$  ratio for rifampin can be attributed  
136 to the ascent of RIF-R mutants. Even at 50X MIC, TET, LZD, and ERY are effectively  
137 bacteriostatic. When exponentially growing cultures of *E. coli* are exposed to 10X MIC  
138 of GEN, KAN, TOB, CST, CIP and MEM, the viable cell density is below that which  
139 can be detected by plating. As with *S. aureus*, the failure of RIF to reduce the viable cell  
140 density can be attributed to the ascent of RIF-R mutants. For *E. coli* exposed to AMP,  
141 our results suggest that the decay in the effective concentration of this drug, probably  
142 due to the chromosomal beta-lactamase effect at high initial densities can account for the  
143 failure of this bactericidal antibiotic to reduce the viable cell density of *E. coli*. As  
144 evidence for this, when cell-free extracts of the 24-hour AMP cultures are spotted onto  
145 lawns of sensitive *E. coli* MG1655, there is no zone of inhibition as there is when we  
146 spot the original media containing 10XMIC AMP.

147

148 **2- Antibiotic-mediated killing of stationary phase bacteria:** For the stationary phase  
149 experiments with both *S. aureus* and *E. coli*, we used cultures that had been incubated

150 under optimal growth conditions for 48 hours. To estimate the amount of unconsumed,  
151 residual, resources in these 48-hour stationary phase cultures, and thereby the capacity  
152 for additional growth, we centrifuged and filtered (0.20 microns) 48-hour cultures of  
153 these bacteria. We then added,  $\sim 10^5$  cells from overnight cultures to the cell-free  
154 filtrates, and estimated the viable cell density after 24 hours of incubation. The results  
155 of this experiment with 3 or six replicas and three independent samples from each,  
156 suggest there little free nutrients available in these 48-hour stationary phase cultures.  
157 The viable cell densities of *S. aureus* and *E. coli* in these cell-free filtrates were  
158 respectively,  $3.5 \pm 0.8 \times 10^6$  and  $4.8 \pm 0.8 \times 10^6$  cells per ml after 24 hours. The  
159 corresponding numbers for stationary phase densities fresh media were more than 500  
160 fold greater.

161

162 At 48 hours, the viable cell densities of the stationary phase cultures were estimated,  
163  $N(0)$ . Following that, 5 ml aliquots were put into the wells of 6-well plates, the  
164 antibiotics added, and the cultures incubated with shaking for another 24 hours, at which  
165 time the viable cell densities were estimated. In Figure 2, we present the results of this  
166 stationary phase experiment.

167

168 In the absence of treatment (the control), there is no significant mortality between 48 and  
169 72 hours for either *S. aureus* or *E. coli*. For *S. aureus*, only high concentrations of the  
170 aminoglycosides, GEN, KAN and TOB, and the cyclic peptide, DAP are effective in  
171 reducing the viable density of these 48-hours stationary phase culture (Figure 2A). For  
172 *E. coli*, the aminoglycosides, GEN, TOB, KAN are also effective for killing stationary



173 phase cells, as is high concentrations of CST. Save possibly for high concentrations  
174 (50XMIC) TET, there is no evidence for the other antibiotics tested (CIP, RIF, AZM,  
175 AMP, CAM) killing stationary phase *E. coli*.  
176

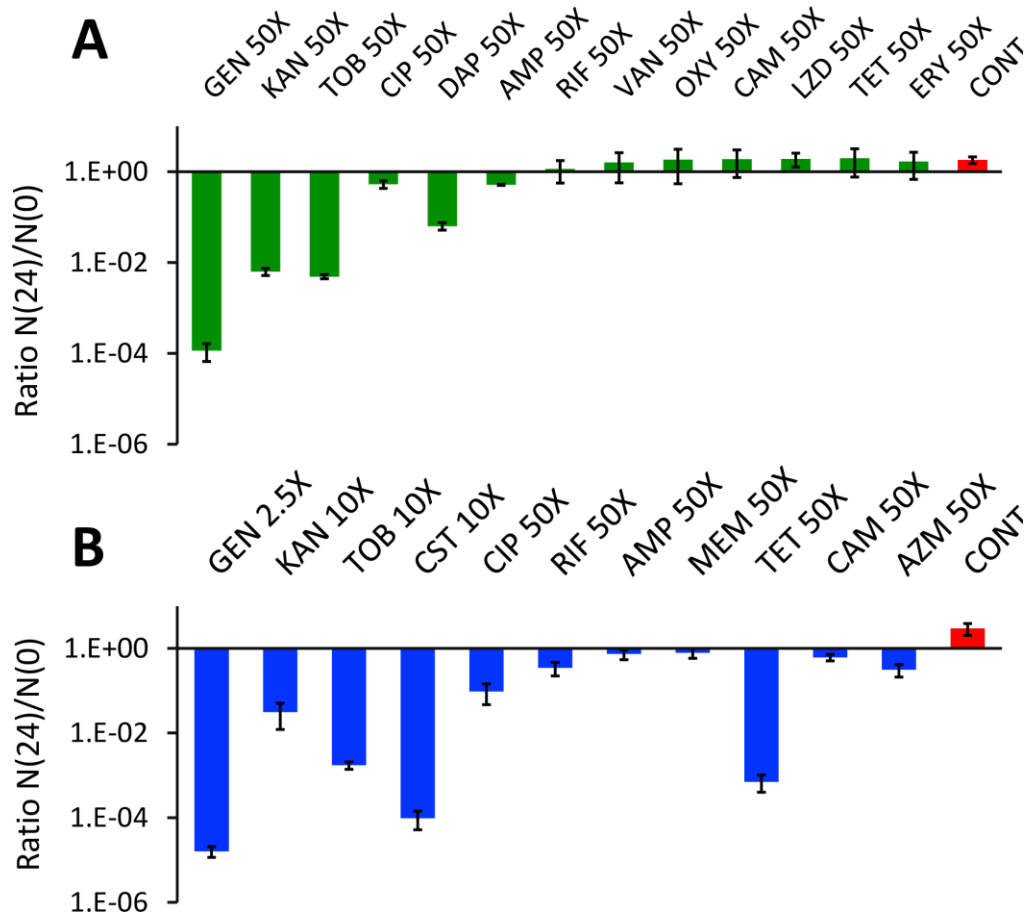

177

178 **Figure 2—Antibiotic treatment of stationary phase bacteria.** Ratio of the viable cell  
179 densities after and before 24 hours of exposure to antibiotics, N(24)/N(0). Forty-eight-  
180 hour stationary phase cultures of *S. aureus* (A) and *E. coli* (B) were treated with the  
181 noted multiples of MIC of different drugs and antibiotic free controls. Average viable  
182 N(0) densities were  $\sim 3.6 \times 10^9$  CFU/ml and  $\sim 8.8 \times 10^8$  CFU/ml for A and B, respectively.  
183 Mean and standard error of the N(24)/N(0) ratios of three or more independent  
184 experiments.

185

186 **3) Antibiotic-mediated killing of persisters:**

187 As can be seen Figure 1B, for *E. coli*, even when concentration ampicillin is 10X the  
188 MIC the density of surviving cells is too low to test for the susceptibility of these cells  
189 for killing by subsequent exposure to bactericidal antibiotics. To address this issue, we  
190 restricted our *E. coli* persister experiments to a *hipA7* (the Moyed mutant (27)) a  
191 construct that produces  $10^3$ - $10^4$  times greater numbers of persisters than wild type due to  
192 an increase in the basal level of (p)ppGpp synthesis (28). This is illustrated in Figure 3,  
193 where we compare the dynamics of formation and the relative densities of persisters for  
194 *E. coli* MG1655 and the *hipA7* construct exposed to 10X MIC ampicillin.

195

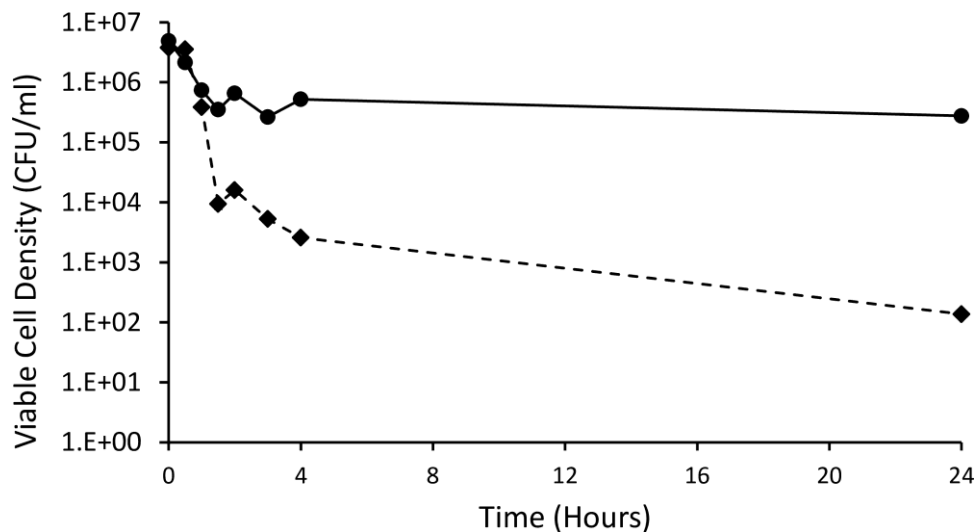

196

197 **Figure 3—Dynamics of *hipA7* persister formation.** Changes in viable cell density of  
198 exponentially growing *E. coli* MG1655 (broken lines) and a *hipA7* mutant of this strain  
199 (solid lines) exposed to 10X MIC Ampicillin. All data points represent the mean and  
200 standard error three independent measurements. Initial densities *hipA7*  $4.9 \pm 0.3 \times 10^6$ ,  
201 MG1655  $3.8 \pm 0.6 \times 10^6$ .

202

203 To generate the *Staphylococcus aureus* persisters, we used a protocol similar to that  
204 employed by (29). Overnight MHII cultures of *S. aureus* Newman were diluted 1/10 in  
205 fresh MHII and 25XMIC ampicillin added immediately. After 24 hours, the viable cell  
206 densities were estimated, N(0). Five mls of these ampicillin treated cultures were put  
207 into the wells of 6 well plates and the second antibiotic(s) added and the cultures  
208 incubated with shaking for another 24 hours. The results of these experiments are  
209 presented in Figure 4A. The extent to which these ampicillin-exposed *S. aureus* die in  
210 the absence of subsequent treatment is noted in by the N(24)/N(0) ratios of the controls,  
211 CON. These *S. aureus* persisters are refractory to killing at 50XC concentrations of the  
212 bactericidal antibiotics CIP, VAN, OXA and the three bacteriostatic drugs, ERY, TET  
213 and LZD. This is not the case for the aminoglycosides, 5XMIC GEN, and 10XMIC  
214 TOB and KAN reduce the viable cell densities of these persisters by nearly three orders  
215 of magnitude. Albeit to an extent less than these aminoglycosides, at 20XMIC, the  
216 cyclic peptide daptomycin also kills these ampicillin-generated *S. aureus* persisters.

217

218 The *hipA7* persisters were prepared with a protocol similar to that employed by Keren  
219 and colleagues(30). Exponentially growing LB cultures of *E. coli hipA7* were exposed  
220 to 10X MIC ciprofloxacin or ampicillin for 4 hours, N(0) at which time they were treated  
221 with the second antibiotic for another 24 hours, N(24). The results of these experiments  
222 are presented in Figure 4B.

223

224

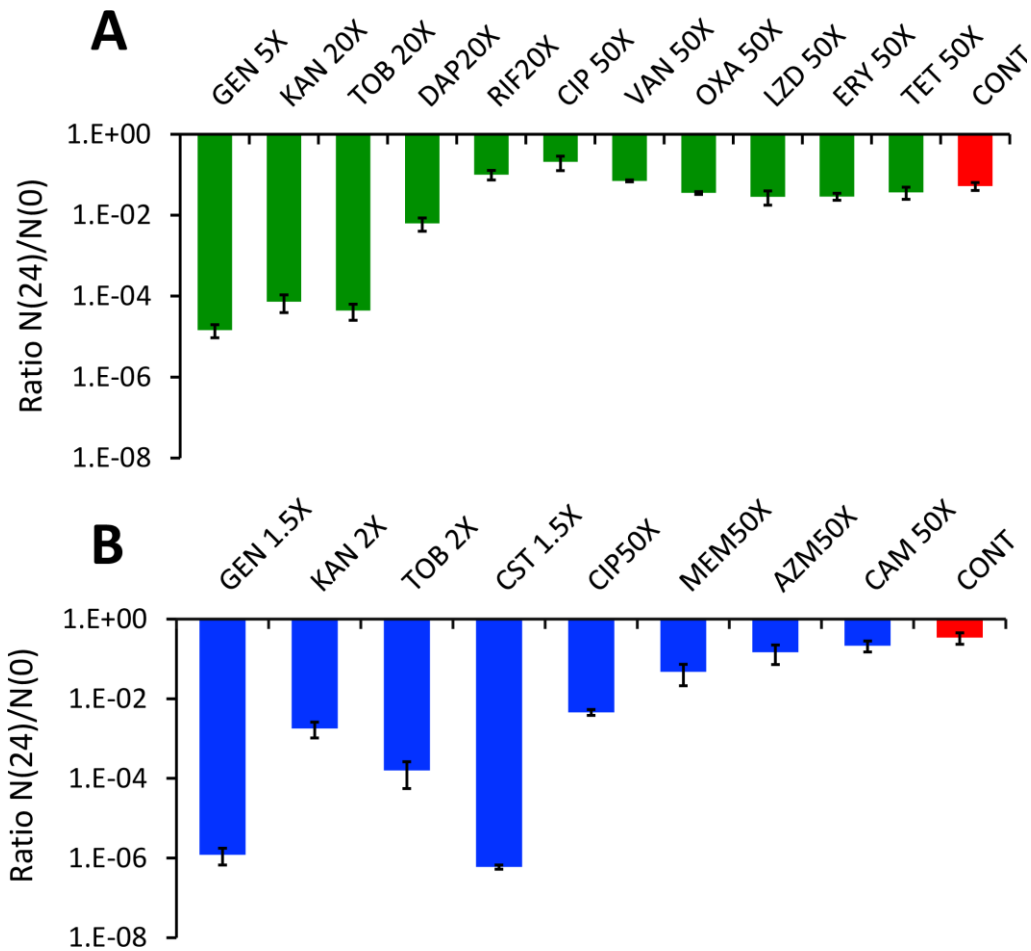

225

226

227 **Figure 4**—Ratio of viable cell density of persisters after 24 hours exposure to the noted  
228 concentrations of exposure to the second antibiotic N(24)/N(0). A. *S. aureus* treated  
229 with 25X MIC Ampicillin to generate the persisters N(0). B. *E. coli hipA7* treated with  
230 10 X MIC Ampicillin to generate the persisters. Mean and standard error of the  
231 N(24)/N(0) ratios from 3 or more independent experiments

232

233 Relative to the controls, low, but super-MIC concentrations of the aminoglycosides,  
234 GEN, KAN and TOB and also the peptide CST reduce the viable cell density of the *E.*  
235 *coli hipA7* persisters by three to six orders of magnitude. Even at 50X MIC the other

236 antibiotics have little or no effect in reducing the viable cell density of the *E. coli hipA7*

237 persisters

238

239 **4- Antibiotic-mediated killing of antibiotic-induced static populations:** Antibiotic

240 induced static populations were generated by exposing exponentially growing *S. aureus*

241 and *E. coli* to bacteriostatic drugs for 24 hours, at which time the viable cell density was

242 estimated  $N(0)$ . The culture was divided into 5ml aliquots in 6 well microtiter plates

243 and the second antibiotic added. The cultures were maintained for another 24 hours and

244 the viable cell densities estimated  $N(24)$ . The results of these experiments are presented

245 in Figure 5.

246

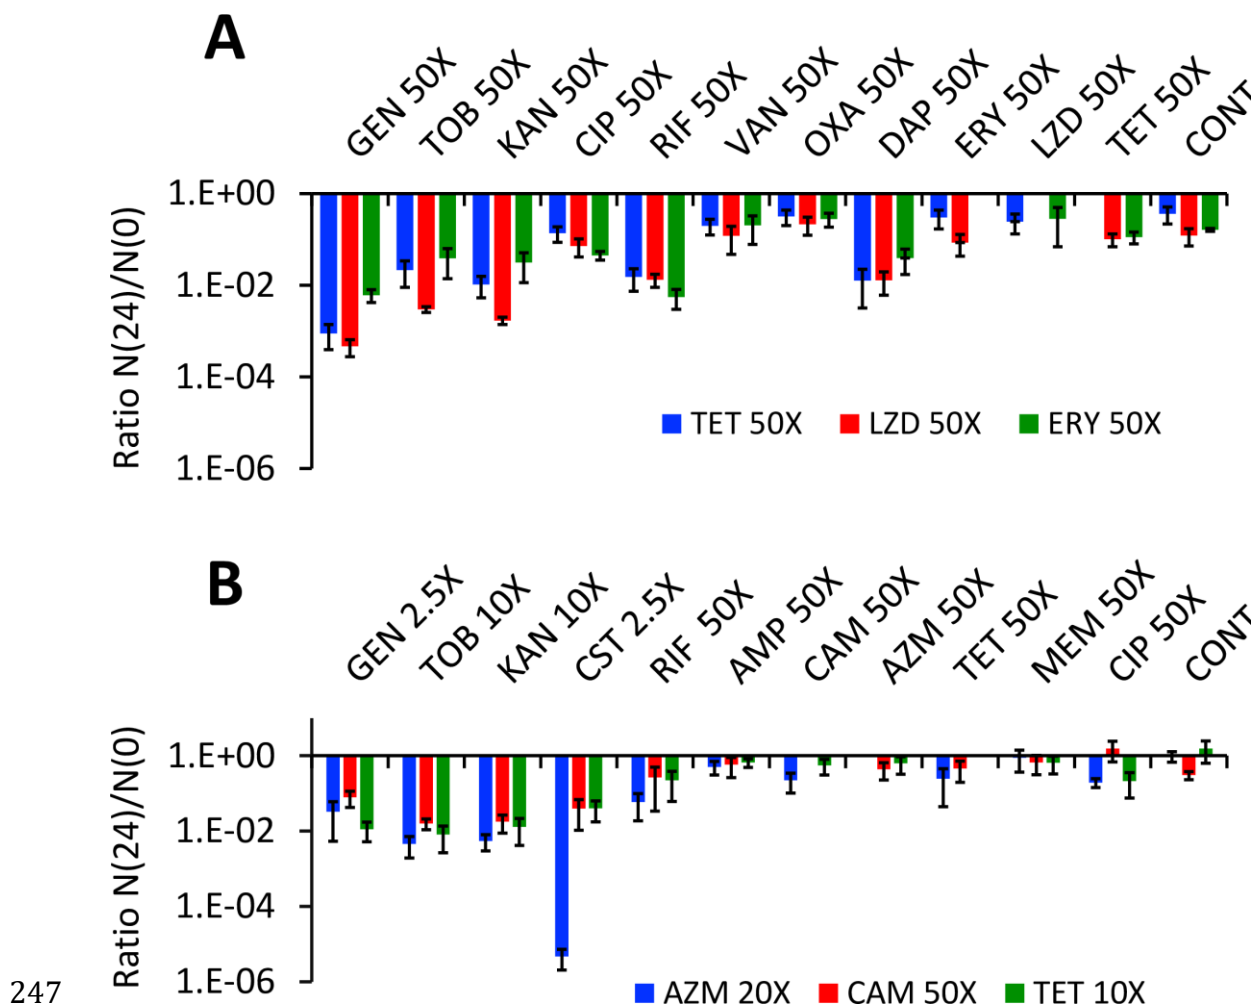

249 **Figure 5**—Antibiotic-mediated killing of antibiotic-static populations. Mean and  
250 standard error of the  $N(24)/N(0)$  ratios (A) *S. aureus*, (B) *E. coli*. The concentrations of  
251 the antibiotics as multiples of MICs used to generate the static populations and for  
252 subsequent treatment are noted in the figure. The densities of the cultures used to  
253 generate the *S. aureus* persisters were between  $3 \times 10^6$  and  $1 \times 10^8$ , and for between  $6 \times 10^6$   
254 and  $7 \times 10^7$  cells per ml for *E. coli* .  
255  
256 The *S. aureus* antibiotic-static populations surviving exposure to tetracycline,  
257 erythromycin and linezolid are killed by the aminoglycosides and by high concentrations

258 of rifampin. The *E. coli* antibiotic-static populations surviving exposure to AZM, CAM  
259 and TET are readily killed by the aminoglycosides and colistin and marginally if at all so  
260 by high concentrations of RIF. As noted in Figure 1A and 1C, even in the absences of  
261 super-treatment, the *S. aureus* antibiotic-static populations die at higher rate than those  
262 of *E. coli*.

263

## 264 **Discussion**

265

266 During the course of an infection, several different conditions contribute to the non-  
267 replicating status of initially growing populations of the infecting bacteria. Among these  
268 conditions are stationary phase resulting from a dearth of the nutrients and resources in  
269 the infected tissues, the formation of biofilms, and the immune defenses, primarily  
270 engulfment by professional and amateur phagocytic host cells. Therapy with antibiotics  
271 will also result in the production of non-replicating populations of bacteria; persists  
272 surviving exposure to bactericidal antibiotics, and stasis induced by bacteriostatic drugs.  
273 We postulate that although they are generated in different ways, common mechanisms  
274 are responsible for the failure of these bacteria to replicate and why the same classes of  
275 antibiotics can used to kill them. These mechanisms involve the general stringent  
276 response, a strongly regulated process governed by the alternative sigma factor RpoS  
277 (30)up-regulated by the accumulation of hyperphosphorylated guanine nucleotides, as  
278 the “alarmone” (p)ppGpp (31-33).

279

280 The contribution of the stringent response to antibiotic-induced stress is not well  
281 understood. A number of observations suggest that antibiotic exposure can trigger a  
282 RpoS-stationary response and the generation of non-replicating populations. Sub-  
283 inhibitory concentrations of beta-lactams induce the stringent response (34, 35).  
284 Response to stress by bacteriostatic antibiotics acting on the ribosome (as macrolides,  
285 chloramphenicol, or tetracyclines) is probably interfered by the reduction in protein  
286 synthesis, which might reduce the building-up of (p)ppGpp, but that might be over-  
287 compensated by reduced degradation of this nucleotide (36, 37). Proteome analysis of  
288 erythromycin-exposed “permeable” *E. coli* suggests a RpoS-regulated profile (38). In  
289 fact, sub-inhibitory concentrations of bacteriostatic antibiotics induce the stringent  
290 response, leading to beta-lactam tolerance (39)

291

292 Cationic peptides, including polymyxins, do not elicit RpoS response, but rather increase  
293 the permeability of the cell membranes and thereby act as rapid “external killers” (40,  
294 41). Whether the aminoglycosides can elicit an RpoS response is unclear at this time. As  
295 is the case of other protein synthesis inhibitors, this machinery might be less effective in  
296 the presence of the antibiotic, than in the absence; the same occur with oxidative stress  
297 responses (37). The rapid killing observed in our work (see Figure 1) may well be  
298 because the stringent response has no time to develop when exposed to these drugs.  
299 However, if aminoglycosides are able to induce the RpoS response, that might favor  
300 aminoglycoside transport into cells that results in membrane-damage and killing of non-  
301 growing cells (42).

302



303 The cellular immune response might also responsible for generating non-replicating  
304 populations? Salmonella RpoS-dependent genes are activated into the intracellular  
305 environment of eukaryotic cells (43). An RpoS active system contributes to survival of  
306 *E. coli* and Salmonella to the phagocyte oxidase-mediated stress resistance (44, 45). and  
307 influences intracellular survival of *Legionella* macrophages and *Acanthamoeba* cells  
308 (46-48). Intracellular survival is also related with the overexpression of heat-shock stress  
309 proteins, promoting non-replication (49, 50).

310

311 These studies suggest that non-replicating bacteria might also arise by the stringent  
312 response derived from professional and/or non-professional phagocytosis. Of course,  
313 aminoglycosides and peptide antibiotics do not enter in eukaryotic cells, but non-  
314 replicating bacteria can be released from phagocytes lysed by bacteria-induced  
315 programmed necrosis, contributing to the chronification of the infection (51). Antibody-  
316 antibiotic conjugates might improve therapy of phagocytized bacteria where  
317 aminoglycosides and peptides are excluded (11).

318

319 We postulate that essentially the same set of cellular responses occurs in the different  
320 stress-inducing conditions bacteria encounter during the infection process, and different  
321 classes of antibiotics have similar pharmacodynamic effects on these different types of  
322 non-replicating cells. These effects probably are expressed as an hormetic (dose-  
323 dependent) stress response(52, Davies, 2006 #416). Of course, non-growth is a complex  
324 mechanism in which the final antibiotic effects are influenced by those resulting from

325 different coexisting stresses, for instance, non-growth resulting from ribosome  
326 hibernation could facilitate some degree of gentamicin tolerance (53).

327

328 The pharmacodynamic data presented in this study are inconsistent with what seems to  
329 be the common conviction that stationary phase populations of bacteria are refractory to  
330 killing by antibiotics (15, 25, 26). We show how aminoglycosides and peptide  
331 antimicrobials kill non-replicating populations of *E. coli* and *S. aureus*. This observation  
332 is not new; it has been known for some time that the aminoglycosides and the cyclic  
333 peptides, daptomycin and colistin are capable of killing stationary phase bacteria (20,  
334 53-55). Less seems to be known about the susceptibility to killing by bactericidal  
335 antibiotics of other non-replicating states of bacteria considered here.

336

337 Although there have been many studies of persistence, relatively little is known about  
338 the susceptibility of these non-replicating bacteria to antibiotics other than those  
339 employed to generate them. One exception to this is a study by Allison and colleagues,  
340 (56) that demonstrates that by adding metabolites, *E. coli* and *S. aureus* persists in the  
341 form of biofilms become susceptible to killing by aminoglycosides. Our results with  
342 the ampicillin-generated planktonic *S. aureus* persisters are fully consistent with these  
343 observations. Results with the *hipA7* persisters used in this work also suggest that *E. coli*  
344 “natural” persisters are sensitive to killing by even low concentrations of the  
345 aminoglycosides and the peptide colistin.

346

347 There is also a relative dearth of quantitative information about the susceptibility to  
348 antibiotic-mediated killing of non-replicating bacteria induced by exposure to  
349 bacteriostatic antibiotics. To be sure, within the first decade after the discovery of  
350 antibiotic, there was evidence for exposure to bacteriostatic drugs reducing the efficacy  
351 of bactericidal (57) and these observations were corroborated more recently (23). Early  
352 observations concerning the lower efficacy of penicillin in static cells produced by  
353 chloramphenicol or tetracycline's have engendered what some may see as an immutable  
354 law in the practice of antibiotic therapy, don't mix bacteriostatic and bactericidal drugs.  
355 However, we show that some existing bactericidal antibiotics are quite effective in  
356 killing bacteria that are not replicating because exposure to bacteriostatic antibiotics,  
357 what we refer to as antibiotic-static populations.

358

359 In summary, stationary-phase *S. aureus* populations are killed at a substantial rate by the  
360 aminoglycosides and to a lesser extent by daptomycin. *S. aureus* persisters generated by  
361 exposure to ampicillin exposure are also killed aminoglycosides and the lipopeptide  
362 daptomycin, but not the other drugs tested. Antibiotic-induced static populations of *S.*  
363 *aureus* maintain the same killing profile, with aminoglycosides and daptomycin as the  
364 sole killing agents, with the exception, in this case of rifampicin. The same antibiotics  
365 are also effective at killing stationary phase *E. coli*, whilst the other antibiotics tested  
366 were not. This is also the case for the *hipA7* *E. coli* persister and *E. coli* "suffering"  
367 from the stasis induced by ribosome-targeting bacteriostatic antibiotics.

368

369

## 370 **Potential clinical implications**

371 In recent years there has been a great of deal of interest in discovering and developing  
372 drugs to treat non-replicating populations of bacteria, particularly those associated with  
373 biofilms. A prime example of this is Kim Lewis and colleague's (58) use of a novel  
374 antibiotic, acyldepsipeptide (ADEP4). Despite growing efforts in the endeavor to find  
375 new antibiotics to kill non-replicating bacteria, the results presented here suggest that  
376 existing antimicrobials may well be up to that task. A well-warranted concern is that the  
377 antibiotics with this virtue are among the more toxic drugs, aminoglycosides and the  
378 peptides(59-61). It should be noted, however, relatively low, and possible non-toxic  
379 concentrations of the aminoglycosides and the peptide, colistin can kill *E. coli* antibiotic-  
380 static and *hipA7* persisters. Most importantly, as has been the case with cancer  
381 chemotherapy, there are conditions under which some toxic side-effects of systemic  
382 treatment are more then made up for by the sometimes life-saving benefits of that  
383 treatment, (62). Of course, inhaled therapy, providing very high local concentrations of  
384 aminoglycosides or peptidic antibiotics, has proven its efficacy in mostly non-growing  
385 populations of *Pseudomonas aeruginosa* and *Staphylococcus aureus* involved in chronic  
386 lung colonization in cystic fibrosis patients (63). Also, high local concentrations of  
387 these antibiotics have been useful in intravesical therapy of recurrent urinary tract  
388 infections (64) or in catheter locking solutions to treat catheter-related bloodstream  
389 infections (65).

390

391 How important persisters are clinically is, at this juncture, not all that clear. Persisters  
392 remain susceptible to phagocytosis and other elements of the innate immune system, the

393 main factor influencing control of infections, can be attributed to the innate immune  
394 system, and they would play little or no little role in reducing the efficacy of antibiotic  
395 therapy (66). Consistent with this yet-to-be tested (but testable) hypothesis in  
396 experimental animals and patients is observation that for immune competent patients,  
397 bacteriostatic drugs are as effective for treatment as highly bactericidal agents (67, 68).

398

399 As intriguing as they may be scientifically, planktonic persisters surviving exposure to  
400 bactericidal antibiotics are not the majority of the non-replicating bacteria present during  
401 the infection process. Stationary phase bacteria resulting from local shortage of  
402 nutrients, non-growing populations induced by bacteriostatic agents, biofilm populations  
403 and phagocytosed bacteria (eventually released by the lysis of the engulfing phagocytes)  
404 are likely to be the majority of phenotypically antibiotic resistant bacteria in an  
405 established infection. They are certainly involved in chronification of infections, and  
406 subsequent reactivations and relapses. It may well be that along with the standard  
407 therapy, the addition of a short-course administration of antibiotics that kill these non-  
408 replicating bacteria, like the aminoglycosides and peptides, may well accelerate the  
409 course of treatment and increase the likelihood of its success.

410

## 411 **Materials & Methods**

412

### 413 **Bacteria, culture and sampling media and procedure**

414 Bacteria: *Staphylococcus aureus* Newman (ATCC 25904), *E. coli* K12 MG1655 and the  
415 high frequency persister strain of *E. coli* K12, *hipA7* constructed by Moyed and

416 Betrand(27)

417 Liquid culture: For the *S. aureus* Mueller-Hinton Broth (MHII) (275710, BD™) and for  
418 *E. coli* Lysogeny Broth (LB) (244620, Difco).

419 Sampling Bacterial Densities: The densities of bacteria were estimated by serial dilution  
420 in 0.85% saline and plating on LB (1.6%) agar plates.

421 Antibiotics and their sources: Ampicillin, chloramphenicol, colistin, gentamicin,  
422 kanamycin, oxacillin, tetracycline, and vancomycin – SIGMA, azithromycin and  
423 tobramycin, TOCRIS, daptomycin, TCI, erythromycin, MP BIOCHEMICALS,  
424 ciprofloxacin and rifampin, APPLICHEM, meropenem- COMBI-BLOCKS, linezolid –  
425 CHEM IMPEX INT’L

426 Minimum Inhibitory Concentrations (MICs): For both *S. aureus* Newman and *E. coli*  
427 MG1655 the MICs of the antibiotic were estimated using the two-fold micro dilution  
428 procedure (69). Two different initial concentrations of antibiotics were used to obtain  
429 accurate measurements from the two-fold micro dilution procedure. The estimated  
430 MICs of each of the antibiotic bacteria combination are listed in Table 1.

431 Table 1 Minimum Inhibitory Concentrations in µg/ml.

|     | <b>Antibiotic</b>     | <i>S. aureus Newman</i> | <i>E. coli MG1655</i> | <i>E. coli MG1655 hipA7</i> |
|-----|-----------------------|-------------------------|-----------------------|-----------------------------|
|     | Ampicillin (AMP)      | 4.7                     | 4.7                   | 4.7                         |
|     | Azithromycin (AZM)    | 2.3                     | 19.0                  | 38.0                        |
|     | Chloramphenicol (CAM) | 13                      | 4.7                   | 4.7                         |
|     | Ciprofloxacin (CIP)   | 0.2                     | 0.6                   | 0.6                         |
|     | Colistin (CST)        | N/A                     | 1.1                   | 1.1                         |
|     | Daptomycin (DAP)      | 1.6                     | N/A                   | N/A                         |
|     | Erythromycin (ERY)    | 0.6                     | N/A                   | N/A                         |
|     | Gentamicin (GEN)      | 0.8                     | 9.3                   | 9.3                         |
|     | Kanamycin (KAN)       | 2.3                     | 4.7                   | 4.7                         |
|     | Linezolid (LZD)       | 1.1                     | N/A                   | N/A                         |
|     | Meropenem (MEM)       | N/A                     | 1.2                   | <b>0.6</b>                  |
|     | Oxacillin (OXA)       | 0.3                     | N/A                   | N/A                         |
|     | Rifampin (RIF)        | 0.002                   | 9.4                   | 9.4                         |
|     | Tetracycline (TET)    | 0.6                     | 2.3                   | 75.0                        |
|     | Tobramycin (TOB)      | 0.3                     | 1.2                   | 2.3                         |
| 432 | Vancomycin (VAN)      | 1.6                     | N/A                   | N/A                         |

433 N(24)/N(0) Ratios: As our measure of the efficacy of the different antibiotics to killing  
434 the exposed bacteria, we use the ratio of the viable cell density after 24 hours of  
435 exposure to the drug and the initial density estimated prior to exposure, N(24)/N(0). For  
436 each experiment, we estimated the N(0) and N(24) densities (CFUs) with three  
437 independent serial dilutions. For each antibiotic - bacteria combination, unless  
438 otherwise stated, we ran at least three independent experiments and calculated the mean  
439 and standard error of the N(24)/N(0) ratios.

440

441

442

443 **Acknowledgement**

444 This research was funded from by a grant from the US National Institutes of Health,  
445 GM098175 to BRL and Regional Government of Madrid (InGEMICS-C, S2017/BMD-  
446 3691). We wish to thank Melony Ivey and Esther Lee for superb technical help.  
447 The funders of this endeavor had no role in designing this study, data collection and  
448 interpretation, or the decision to submit this work for publication.

449

450 **References**

451

- 452 1. **Kolter R, Siegele DA, Tormo A.** 1993. The stationary phase of the bacterial  
453 life cycle. *Annu Rev Microbiol* **47**:855-874.
- 454 2. **Boyd W, Sheldon H.** 1980. *Introduction to the Study of Disease.* Lea &  
455 Febiger.
- 456 3. **Eng RH.** 1980. Bactericidal screening test for late complement component  
457 deficiencies or defects. *J Clin Microbiol* **11**:631-634.
- 458 4. **Kirby AE, Garner K, Levin BR.** 2012. The relative contributions of physical  
459 structure and cell density to the antibiotic susceptibility of bacteria in  
460 biofilms. *Antimicrob Agents Chemother* **56**:2967-2975.
- 461 5. **Costerton JW, Stewart PS, Greenberg EP.** 1999. Bacterial biofilms: a  
462 common cause of persistent infections. *Science* **284**:1318-1322.
- 463 6. **Lewis K.** 2005. Persister cells and the riddle of biofilm survival.  
464 *Biochemistry (Mosc)* **70**:267-274.



- 465 7. **Bigger JW.** 1944. Treatment of Staphylococcal infections with penicillin. The  
466 Lancet **244**:497-500.
- 467 8. **Balaban NQ, Merrin J, Chait R, Kowalik L, Leibler S.** 2004. Bacterial  
468 persistence as a phenotypic switch. Science **305**:1622-1625.
- 469 9. **Levin BR, Concepcion-Acevedo J, Udekwu KI.** 2014. Persistence: a  
470 copacetic and parsimonious hypothesis for the existence of non-inherited  
471 resistance to antibiotics. Curr Opin Microbiol **21**:18-21.
- 472 10. **Thwaites GE, Gant V.** 2011. Are bloodstream leukocytes Trojan Horses for  
473 the metastasis of Staphylococcus aureus? Nat Rev Microbiol **9**:215-222.
- 474 11. **Lehar SM, Pillow T, Xu M, Staben L, Kajihara KK, Vandlen R, DePalatis L,**  
475 **Raab H, Hazenbos WL, Morisaki JH, Kim J, Park S, Darwish M, Lee BC,**  
476 **Hernandez H, Loyet KM, Lupardus P, Fong R, Yan D, Chalouni C, Luis E,**  
477 **Khalfin Y, Plise E, Cheong J, Lyssikatos JP, Strandh M, Koefoed K,**  
478 **Andersen PS, Flygare JA, Wah Tan M, Brown EJ, Mariathasan S.** 2015.  
479 Novel antibody-antibiotic conjugate eliminates intracellular S. aureus.  
480 Nature **527**:323-328.
- 481 12. **Costerton JW, Lewandowski Z, Caldwell DE, Korber DR, Lappin-Scott**  
482 **HM.** 1995. Microbial biofilms. Annu Rev Microbiol **49**:711-745.
- 483 13. **Stewart PS.** 2002. Mechanisms of antibiotic resistance in bacterial biofilms.  
484 Int J Med Microbiol **292**:107-113.
- 485 14. **Koch AL, Gross GH.** 1979. Growth conditions and rifampin susceptibility.  
486 Antimicrob Agents Chemother **15**:220-228.

- 487 15. **Tuomanen E, Cozens R, Tosch W, Zak O, Tomasz A.** 1986. The rate of  
488 killing of *Escherichia coli* by beta-lactam antibiotics is strictly proportional  
489 to the rate of bacterial growth. *J Gen Microbiol* **132**:1297-1304.
- 490 16. **Brown MR, Collier PJ, Gilbert P.** 1990. Influence of growth rate on  
491 susceptibility to antimicrobial agents: modification of the cell envelope and  
492 batch and continuous culture studies. *Antimicrob Agents Chemother*  
493 **34**:1623-1628.
- 494 17. **Evans DJ, Allison DG, Brown MR, Gilbert P.** 1991. Susceptibility of  
495 *Pseudomonas aeruginosa* and *Escherichia coli* biofilms towards  
496 ciprofloxacin: effect of specific growth rate. *J Antimicrob Chemother* **27**:177-  
497 184.
- 498 18. **Evans DJ, Allison DG, Brown MR, Gilbert P.** 1990. Effect of growth-rate on  
499 resistance of gram-negative biofilms to ceftrimide. *J Antimicrob Chemother*  
500 **26**:473-478.
- 501 19. **Chmara H, Ripa S, Mignini F, Borowski E.** 1991. Bacteriolytic effect of  
502 teicoplanin. *J Gen Microbiol* **137**:913-919.
- 503 20. **Mascio CT, Alder JD, Silverman JA.** 2007. Bactericidal action of daptomycin  
504 against stationary-phase and nondividing *Staphylococcus aureus* cells.  
505 *Antimicrob Agents Chemother* **51**:4255-4260.
- 506 21. **Lepper MH, Dowling HF.** 1951. Treatment of pneumococcal meningitis  
507 with penicillin compared with penicillin plus aureomycin; studies including  
508 observations on an apparent antagonism between penicillin and  
509 aureomycin. *AMA Arch Intern Med* **88**:489-494.

- 510 22. **Garrod LP.** 1972. Causes of failure in antibiotic treatment. *Br Med J* **4**:473-  
511 476.
- 512 23. **Ocampo PS, Lazar V, Papp B, Arnoldini M, Abel zur Wiesch P, Busa-  
513 Fekete R, Fekete G, Pal C, Ackermann M, Bonhoeffer S.** 2014. Antagonism  
514 between bacteriostatic and bactericidal antibiotics is prevalent. *Antimicrob  
515 Agents Chemother* **58**:4573-4582.
- 516 24. **Eng RH, Padberg FT, Smith SM, Tan EN, Cherubin CE.** 1991. Bactericidal  
517 effects of antibiotics on slowly growing and nongrowing bacteria.  
518 *Antimicrob Agents Chemother* **35**:1824-1828.
- 519 25. **Tuomanen E, Schwartz J, Sande S.** 1990. The vir locus affects the response  
520 of *Bordetella pertussis* to antibiotics: phenotypic tolerance and control of  
521 autolysis. *J Infect Dis* **162**:560-563.
- 522 26. **Hurdle JG, O'Neill AJ, Chopra I, Lee RE.** 2011. Targeting bacterial  
523 membrane function: an underexploited mechanism for treating persistent  
524 infections. *Nat Rev Microbiol* **9**:62-75.
- 525 27. **Moyed HS, Bertrand KP.** 1983. *hipA*, a newly recognized gene of  
526 *Escherichia coli* K-12 that affects frequency of persistence after inhibition of  
527 murein synthesis. *J Bacteriol* **155**:768-775.
- 528 28. **Korch SB, Henderson TA, Hill TM.** 2003. Characterization of the *hipA7*  
529 allele of *Escherichia coli* and evidence that high persistence is governed by  
530 (p)ppGpp synthesis. *Mol Microbiol* **50**:1199-1213.

- 531 29. **Joers A, Kaldalu N, Tenson T.** 2010. The frequency of persisters in  
532 *Escherichia coli* reflects the kinetics of awakening from dormancy. *J*  
533 *Bacteriol* **192**:3379-3384.
- 534 30. **Keren I, Shah D, Spoering A, Kaldalu N, Lewis K.** 2004. Specialized  
535 persister cells and the mechanism of multidrug tolerance in *Escherichia coli*.  
536 *J Bacteriol* **186**:8172-8180.
- 537 31. **Kamarthapu V, Epshtein V, Benjamin B, Proshkin S, Mironov A, Cashel**  
538 **M, Nudler E.** 2016. ppGpp couples transcription to DNA repair in *E. coli*.  
539 *Science* **352**:993-996.
- 540 32. **Magnusson LU, Farewell A, Nystrom T.** 2005. ppGpp: a global regulator in  
541 *Escherichia coli*. *Trends Microbiol* **13**:236-242.
- 542 33. **Srivatsan A, Wang JD.** 2008. Control of bacterial transcription, translation  
543 and replication by (p)ppGpp. *Curr Opin Microbiol* **11**:100-105.
- 544 34. **Gutierrez A, Laureti L, Crussard S, Abida H, Rodriguez-Rojas A,**  
545 **Blazquez J, Baharoglu Z, Mazel D, Darfeuille F, Vogel J, Matic I.** 2013.  
546 beta-Lactam antibiotics promote bacterial mutagenesis via an RpoS-  
547 mediated reduction in replication fidelity. *Nat Commun* **4**:1610.
- 548 35. **Doumith M, Mushtaq S, Livermore DM, Woodford N.** 2016. New insights  
549 into the regulatory pathways associated with the activation of the stringent  
550 response in bacterial resistance to the PBP2-targeted antibiotics, mecillinam  
551 and OP0595/RG6080. *J Antimicrob Chemother* **71**:2810-2814.
- 552 36. **Cortay JC, Cozzone AJ.** 1983. A study of bacterial response to polypeptide  
553 antibiotics. *FEBS Lett* **157**:307-310.

- 554 37. **Fung DK, Chan EW, Chin ML, Chan RC.** 2010. Delineation of a bacterial  
555 starvation stress response network which can mediate antibiotic tolerance  
556 development. *Antimicrob Agents Chemother* **54**:1082-1093.
- 557 38. **Petrackova D, Janecek J, Bezouskova S, Kalachova L, Technikova Z,**  
558 **Buriankova K, Halada P, Haladova K, Weiser J.** 2013. Fitness and  
559 proteome changes accompanying the development of erythromycin  
560 resistance in a population of *Escherichia coli* grown in continuous culture.  
561 *Microbiologyopen* **2**:841-852.
- 562 39. **Kudrin P, Varik V, Oliveira SR, Beljantseva J, Del Peso Santos T, Dzhygyr**  
563 **I, Rejman D, Cava F, Tenson T, Hauryliuk V.** 2017. Subinhibitory  
564 Concentrations of Bacteriostatic Antibiotics Induce *relA*-Dependent and  
565 *relA*-Independent Tolerance to beta-Lactams. *Antimicrob Agents Chemother*  
566 **61**.
- 567 40. **Rodriguez-Rojas A, Makarova O, Rolff J.** 2014. Antimicrobials, stress and  
568 mutagenesis. *PLoS Pathog* **10**:e1004445.
- 569 41. **McLeod GI, Spector MP.** 1996. Starvation- and Stationary-phase-induced  
570 resistance to the antimicrobial peptide polymyxin B in *Salmonella*  
571 *typhimurium* is RpoS ( $\sigma^S$ ) independent and occurs through both  
572 *phoP*-dependent and -independent pathways. *J Bacteriol* **178**:3683-3688.
- 573 42. **Mok WW, Orman MA, Brynildsen MP.** 2015. Impacts of global  
574 transcriptional regulators on persister metabolism. *Antimicrob Agents*  
575 *Chemother* **59**:2713-2719.

- 576 43. **Chen CY, Eckmann L, Libby SJ, Fang FC, Okamoto S, Kagnoff MF, Fierer J,**  
577 **Guiney DG.** 1996. Expression of *Salmonella typhimurium* rpoS and rpoS-  
578 dependent genes in the intracellular environment of eukaryotic cells. *Infect*  
579 *Immun* **64**:4739-4743.
- 580 44. **Hryckowian AJ, Welch RA.** 2013. RpoS contributes to phagocyte oxidase-  
581 mediated stress resistance during urinary tract infection by *Escherichia coli*  
582 CFT073. *MBio* **4**:e00023-00013.
- 583 45. **Alam MS, Zaki MH, Yoshitake J, Akuta T, Ezaki T, Akaike T.** 2006.  
584 Involvement of *Salmonella enterica* serovar Typhi RpoS in resistance to NO-  
585 mediated host defense against serovar Typhi infection. *Microb Pathog*  
586 **40**:116-125.
- 587 46. **Hovel-Miner G, Pampou S, Faucher SP, Clarke M, Morozova I, Morozov**  
588 **P, Russo JJ, Shuman HA, Kalachikov S.** 2009. SigmaS controls multiple  
589 pathways associated with intracellular multiplication of *Legionella*  
590 *pneumophila*. *J Bacteriol* **191**:2461-2473.
- 591 47. **Abu-Zant A, Asare R, Graham JE, Abu Kwaik Y.** 2006. Role for RpoS but  
592 not RelA of *Legionella pneumophila* in modulation of phagosome biogenesis  
593 and adaptation to the phagosomal microenvironment. *Infect Immun*  
594 **74**:3021-3026.
- 595 48. **Hales LM, Shuman HA.** 1999. The *Legionella pneumophila* rpoS gene is  
596 required for growth within *Acanthamoeba castellanii*. *J Bacteriol* **181**:4879-  
597 4889.

- 598 49. **Stewart GR, Young DB.** 2004. Heat-shock proteins and the host-pathogen  
599 interaction during bacterial infection. *Curr Opin Immunol* **16**:506-510.
- 600 50. **Basu A, Yap MN.** 2016. Ribosome hibernation factor promotes  
601 Staphylococcal survival and differentially represses translation. *Nucleic*  
602 *Acids Res* **44**:4881-4893.
- 603 51. **Greenlee-Wacker MC, Rigby KM, Kobayashi SD, Porter AR, DeLeo FR,**  
604 **Nauseef WM.** 2014. Phagocytosis of *Staphylococcus aureus* by human  
605 neutrophils prevents macrophage efferocytosis and induces programmed  
606 necrosis. *J Immunol* **192**:4709-4717.
- 607 52. **Mathieu A, Fleurier S, Frenoy A, Dairou J, Bredeche MF, Sanchez-**  
608 **Vizute P, Song X, Matic I.** 2016. Discovery and Function of a General Core  
609 Hormetic Stress Response in *E. coli* Induced by Sublethal Concentrations of  
610 Antibiotics. *Cell Rep* **17**:46-57.
- 611 53. **McKay SL, Portnoy DA.** 2015. Ribosome hibernation facilitates tolerance of  
612 stationary-phase bacteria to aminoglycosides. *Antimicrob Agents*  
613 *Chemother* **59**:6992-6999.
- 614 54. **Jiafeng L, Fu X, Chang Z.** 2015. Hypoionic shock treatment enables  
615 aminoglycosides antibiotics to eradicate bacterial persisters. *Sci Rep*  
616 **5**:14247.
- 617 55. **Uppu D, Konai MM, Sarkar P, Samaddar S, Fensterseifer ICM, Farias-**  
618 **Junior C, Krishnamoorthy P, Shome BR, Franco OL, Haldar J.** 2017.  
619 Membrane-active macromolecules kill antibiotic-tolerant bacteria and

- 620           potentiate antibiotics towards Gram-negative bacteria. PLoS One  
621           **12:e0183263.**
- 622   56.   **Allison KR, Brynildsen MP, Collins JJ.** 2011. Metabolite-enabled  
623           eradication of bacterial persisters by aminoglycosides. Nature **473**:216-220.
- 624   57.   **Jawetz E, Gunnison JB.** 1952. Studies on antibiotic synergism and  
625           antagonism: a scheme of combined antibiotic action. Antibiot Chemother  
626           (Northfield) **2**:243-248.
- 627   58.   **Conlon BP, Nakayasu ES, Fleck LE, LaFleur MD, Isabella VM, Coleman K,**  
628           **Leonard SN, Smith RD, Adkins JN, Lewis K.** 2013. Activated ClpP kills  
629           persisters and eradicates a chronic biofilm infection. Nature **503**:365-370.
- 630   59.   **Prokhorova I, Altman RB, Djumagulov M, Shrestha JP, Urzhumtsev A,**  
631           **Ferguson A, Chang CT, Yusupov M, Blanchard SC, Yusupova G.** 2017.  
632           Aminoglycoside interactions and impacts on the eukaryotic ribosome. Proc  
633           Natl Acad Sci U S A **114**:E10899-E10908.
- 634   60.   **Lim LM, Ly N, Anderson D, Yang JC, Macander L, Jarkowski A, 3rd,**  
635           **Forrest A, Bulitta JB, Tsuji BT.** 2010. Resurgence of colistin: a review of  
636           resistance, toxicity, pharmacodynamics, and dosing. Pharmacotherapy  
637           **30**:1279-1291.
- 638   61.   **Figuroa DA, Mangini E, Amodio-Groton M, Vardianos B, Melchert A,**  
639           **Fana C, Wehbeh W, Urban CM, Segal-Maurer S.** 2009. Safety of high-dose  
640           intravenous daptomycin treatment: three-year cumulative experience in a  
641           clinical program. Clin Infect Dis **49**:177-180.



- 642 62. **Rolain JM, Baquero F.** 2016. The refusal of the Society to accept antibiotic  
643 toxicity: missing opportunities for therapy of severe infections. Clin  
644 Microbiol Infect **22**:423-427.
- 645 63. **Langton Hewer SC, Smyth AR.** 2017. Antibiotic strategies for eradicating  
646 *Pseudomonas aeruginosa* in people with cystic fibrosis. Cochrane Database  
647 Syst Rev **4**:CD004197.
- 648 64. **Pietropaolo A, Jones P, Moors M, Birch B, Somani BK.** 2018. Use and  
649 Effectiveness of Antimicrobial Intravesical Treatment for Prophylaxis and  
650 Treatment of Recurrent Urinary Tract Infections (UTIs): a Systematic  
651 Review. Curr Urol Rep **19**:78.
- 652 65. **Moore CL, Besarab A, Ajluni M, Soi V, Peterson EL, Johnson LE, Zervos**  
653 **MJ, Adams E, Yee J.** 2014. Comparative effectiveness of two catheter locking  
654 solutions to reduce catheter-related bloodstream infection in hemodialysis  
655 patients. Clin J Am Soc Nephrol **9**:1232-1239.
- 656 66. **Levin BR, Baquero F, Ankomah PP, McCall IC.** 2017. Phagocytes,  
657 Antibiotics, and Self-Limiting Bacterial Infections. Trends Microbiol **25**:878-  
658 892.
- 659 67. **Nemeth J, Oesch G, Kuster SP.** 2015. Bacteriostatic versus bactericidal  
660 antibiotics for patients with serious bacterial infections: systematic review  
661 and meta-analysis. J Antimicrob Chemother **70**:382-395.
- 662 68. **Spellberg B, Bartlett J, Wunderink R, Gilbert DN.** 2015. Novel approaches  
663 are needed to develop tomorrow's antibacterial therapies. Am J Respir Crit  
664 Care Med **191**:135-140.

- 665 69. **Jorgensen JH, Ferraro MJ.** 2009. Antimicrobial susceptibility testing: a  
666 review of general principles and contemporary practices. *Clin Infect Dis*  
667 **49**:1749-1755.  
668
